# Supplementary material for: RNA-Seq Analysis of the Key Long Noncoding RNAs and mRNAs Related to the Regulation of Hepatic Lipid Metabolism in Oreochromis niloticus
Source: MDPI journal article supplement (doi:10.3390/fishes7060332), 2022-11-11
Supplement: s1 [file s1]

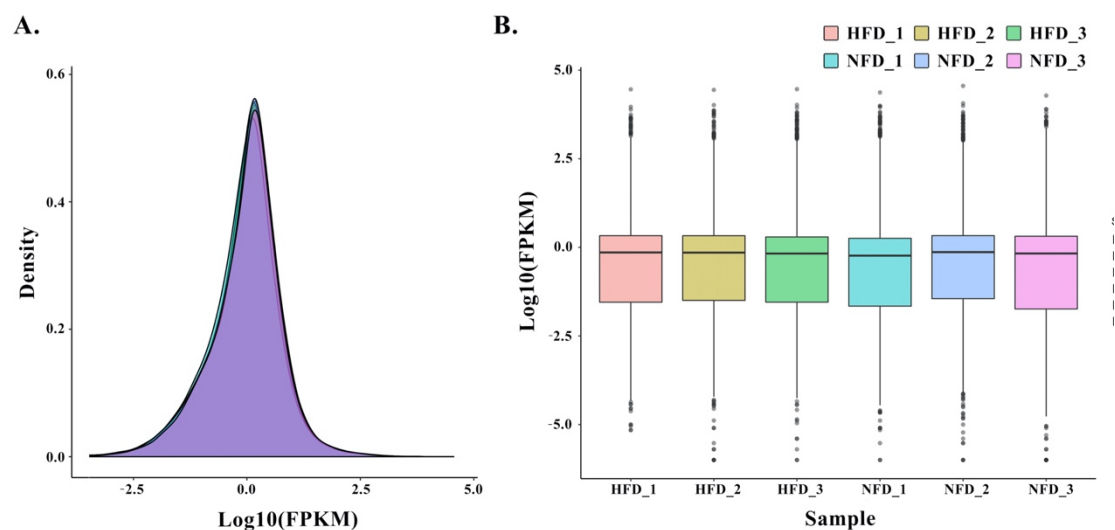

**Figure S1.** Density plot **(A)** showing the distribution of expression density of each sample. Box plot **(B)** showing the distribution of maximum, minimum and percentile values for normalized signals of each sample.
