# Supplementary material for: RNA-Seq Analysis of the Key Long Noncoding RNAs and mRNAs Related to the Regulation of Hepatic Lipid Metabolism in Oreochromis niloticus
Source: MDPI journal article supplement (doi:10.3390/fishes7060332), 2022-11-11
Supplement: s1 [file s1]

Table S1. Ingredients and composition of NFD and HFD

|                                                  | NFD    | HFD    |
|--------------------------------------------------|--------|--------|
| Fish meal <sup>*)</sup>                          | 100.0  | 100.0  |
| Casein                                           | 76.0   | 76.0   |
| Gelatin                                          | 19.0   | 19.0   |
| Corn starch                                      | 237.7  | 4.8    |
| Soybean oil                                      | 68.0   | 170.0  |
| Soybean meal                                     | 120.0  | 120.0  |
| Cottonseed meal                                  | 150.0  | 150.0  |
| Rapeseed meal                                    | 150.0  | 150.0  |
| Vitamin premix <sup>‡)</sup>                     | 5.0    | 5.0    |
| Mineral premix <sup>§)</sup>                     | 5.0    | 5.0    |
| Choline chloride                                 | 5.0    | 5.0    |
| Vitamin C phosphateester                         | 2.0    | 2.0    |
| Ca(H <sub>2</sub> PO <sub>4</sub> ) <sub>2</sub> | 15.0   | 15.0   |
| α -cellulose                                     | 47.3   | 178.2  |
| Total                                            | 1000.0 | 1000.0 |
| Crude protein                                    | 326.8  | 328.7  |
| Crude lipid                                      | 80.7   | 184.1  |
| Gross energy(KJ/g diet)                          | 147.7  | 150.5  |

\*American Seafood, purchased from Coland Feed Co. Ltd. Wuhan, P. R. China. Chemical composition: moisture: 4.26%; crude protein: 68.97% of dry matter; crude lipid: 8.97%; ash: 12.15%.

‡Vitamin premix(mg/kg dry diet):V<sub>A</sub> 10, V<sub>D</sub> 0.05 ,V<sub>E</sub> 400, V<sub>K</sub> 40, V<sub>B1</sub> 50, V<sub>B2</sub> 200 ,V<sub>B3</sub> 500, V<sub>B6</sub> 50, V<sub>B7</sub> 5, V<sub>B11</sub> 15, V<sub>B12</sub> 0.1 ,V<sub>C</sub>1000, inositol 2000, choline 5000.

§Mineral premix(mg/kg dry diet): FeSO<sub>4</sub>·7H<sub>2</sub>O 372, CuSO<sub>4</sub>·5H<sub>2</sub>O 25, ZnSO<sub>4</sub>·7H<sub>2</sub>O 120, MnSO<sub>4</sub>·H<sub>2</sub>O 5, MgSO<sub>4</sub> 2475, NaCl 1875, KH<sub>2</sub>PO<sub>4</sub> 1000, Ca (H<sub>2</sub>PO<sub>4</sub>)<sub>2</sub> 2500.
