# Supplementary material for: RNA-Seq Analysis of the Key Long Noncoding RNAs and mRNAs Related to the Regulation of Hepatic Lipid Metabolism in Oreochromis niloticus
Source: MDPI journal article supplement (doi:10.3390/fishes7060332), 2022-11-11
Supplement: s1 [file s1]

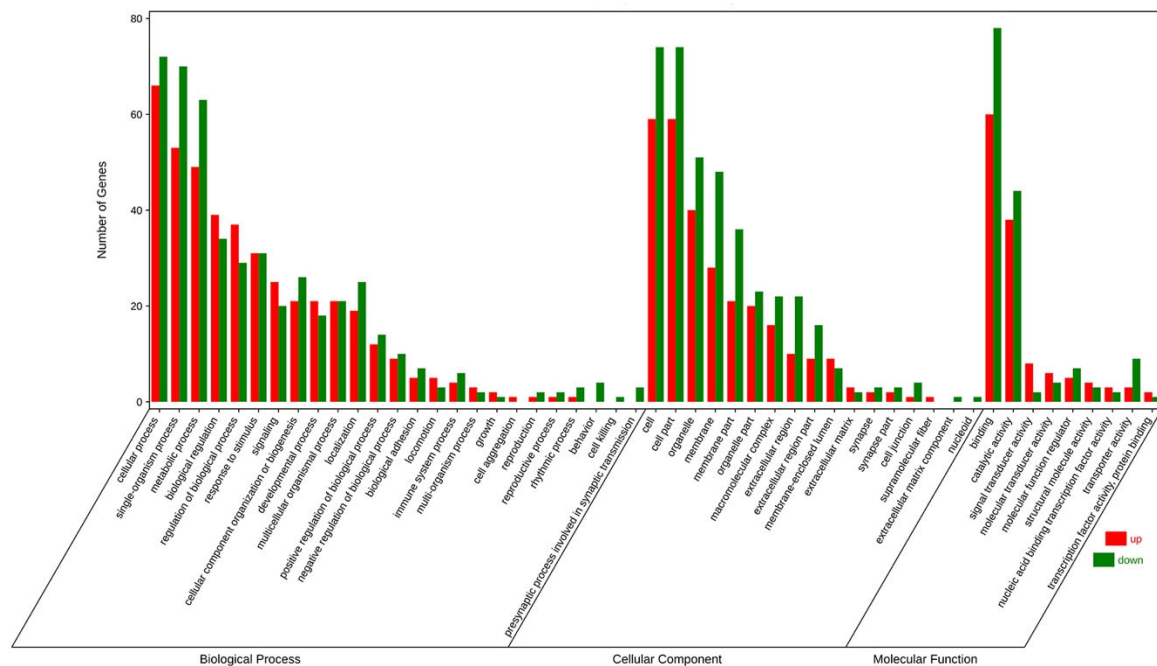

**Figure. S2.** DE-mRNAs enriched in three categories: biological process, molecular function and cellular component, and their main level 2 GO terms.
