# Supplementary material for: RNA-Seq Analysis of the Key Long Noncoding RNAs and mRNAs Related to the Regulation of Hepatic Lipid Metabolism in Oreochromis niloticus
Source: MDPI journal article supplement (doi:10.3390/fishes7060332), 2022-11-11
Supplement: s1 [file s1]

**Table S2.** Overview of hepatic sequencing data and quality filtering

|       | Raw Reads | Valid Reads | Mapped Reads | Clean Bases<br>(G) | Q20(%) | Q30(%) | GC content (%) |
|-------|-----------|-------------|--------------|--------------------|--------|--------|----------------|
| HFD_1 | 83073864  | 82620568    | 71967517     | 12.39              | 99.99  | 97.72  | 45             |
| HFD_2 | 82648786  | 82070870    | 71370742     | 12.31              | 99.99  | 97.91  | 44.5           |
| HFD_3 | 81212162  | 80662722    | 70259924     | 12.10              | 99.99  | 97.66  | 45             |
| NFD_1 | 79949460  | 79439478    | 69364241     | 11.92              | 99.99  | 97.67  | 45             |
| NFD_2 | 87669772  | 86665870    | 75226380     | 13.00              | 99.99  | 97.60  | 45             |
| NFD_3 | 60513932  | 60134656    | 52574039     | 9.02               | 99.99  | 96.77  | 44.5           |
